# Supplementary material
Source: PubMed Central journal article supplement (PMC6640731)
Supplement: ao6b00050_si_001.pdf [file ao6b00050_si_001.pdf]

**Supporting Information:**

**Surfactant-mediated One-pot Method to Prepare Pd-CeO<sub>2</sub> Colloidal Assembled Spheres and Its Enhanced Catalytic Performance for CO oxidation**

Chenhao Du<sup>1</sup>, Guanzhong Lu<sup>1,\*</sup>, Yun Guo<sup>1</sup>, Yanglong Guo<sup>1</sup>, and Xue-qing Gong<sup>1</sup>

<sup>1</sup>Key Laboratory for Advanced Materials and Research Institute of Industrial Catalysis, School of Chemistry and Molecular Engineering, East China University of Science and Technology, Shanghai 200237, P. R. China. \*E-mail: gzhlu@ecust.edu.cn; Fax: +86 21 6425 2923

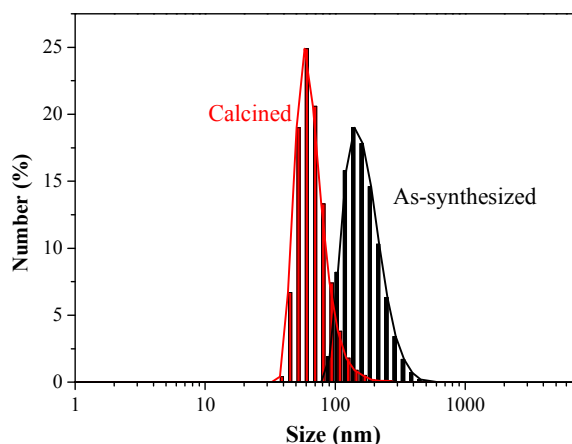

**Figure S1.** Size distribution of as-synthesized and calcined Pd-CeO<sub>2</sub> CASs at 600 °C.

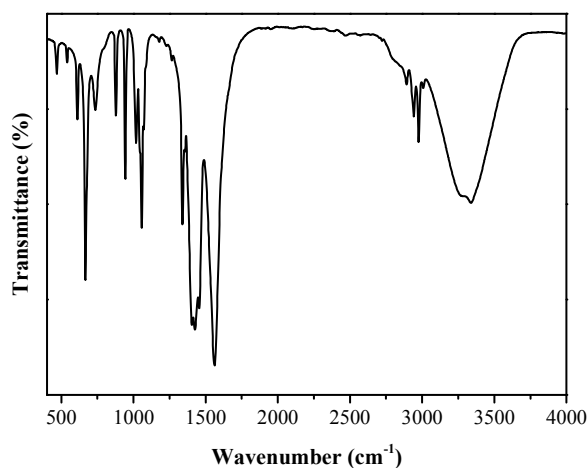

**Figure S2.** FT-IR spectrum of the sample after 1.5 h of the synthesis reaction. IR (KBr, cm<sup>-1</sup>): 3340  $\nu$ (O-H), 2942 and 2895  $\nu$ (C-H) C<sub>2</sub>H<sub>4</sub>, 1562  $\nu$ (OCO), 1425  $\nu$ (C-C) as, 1057  $\nu$ (C-O), 661  $\nu$ (-(CH<sub>2</sub>)<sub>3</sub>-) PVP.

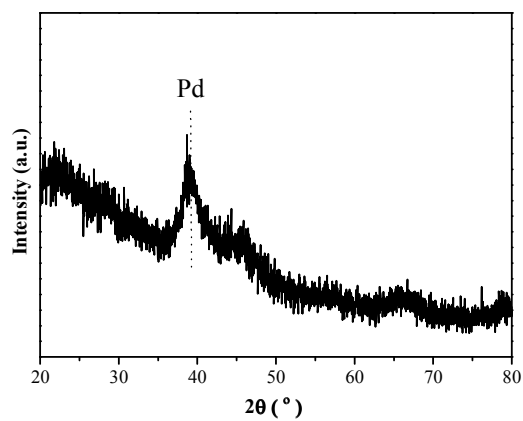

**Figure S3.** XRD pattern of the sample prepared at 130 °C for 15 h without adding  $\text{NH}_4\text{OH}$ .

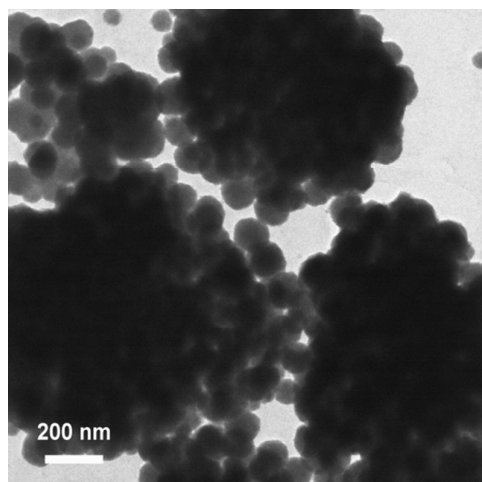

**Figure S4.** TEM image of the sample prepared at 130 °C for 15 h with 0.8 mL  $\text{NH}_4\text{OH}$ .

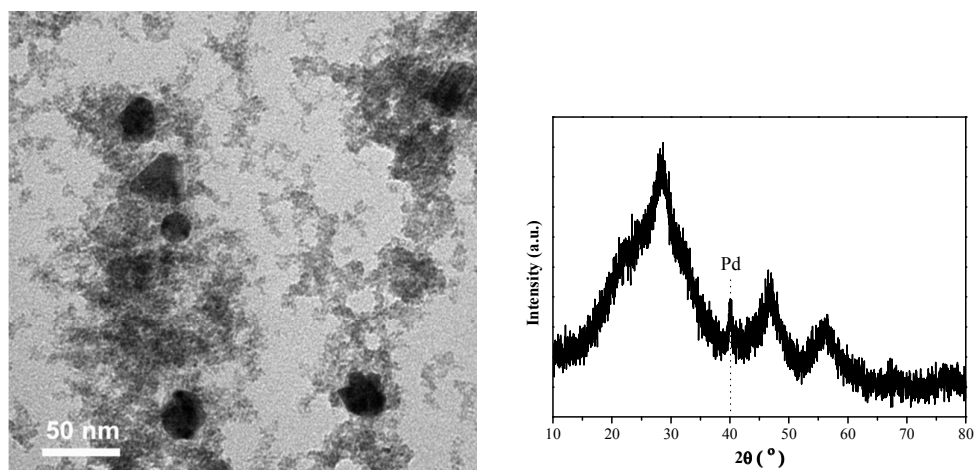

**Figure S5.** TEM image and XRD pattern of the sample prepared at 130 °C for 15 h without adding acetic acid and  $\text{N}(\text{CH}_3)_4\text{OH}$ .

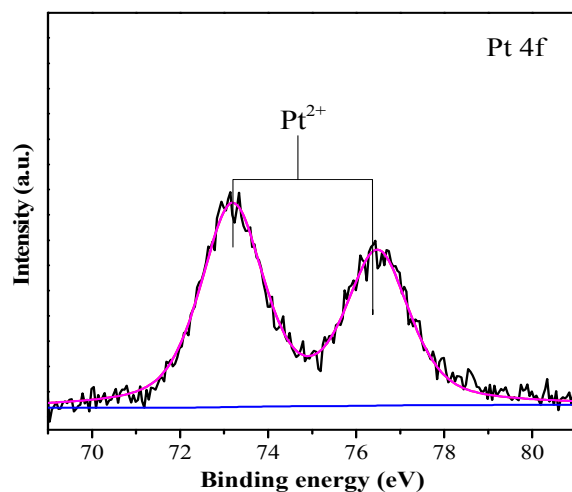

**Figure S6.** Pt 4f XPS spectrum of Pt-CeO<sub>2</sub> CASs. The peak at BE= 73 eV is corresponding to the ionic Pd<sup>2+</sup> species.<sup>1</sup> This result showed that the exposed Pt species on the Pt-CeO<sub>2</sub> CASs existed in the form of ionic Pt<sup>2+</sup>, which is caused by the strong interaction between Pt and CeO<sub>2</sub> during the synthesis process.

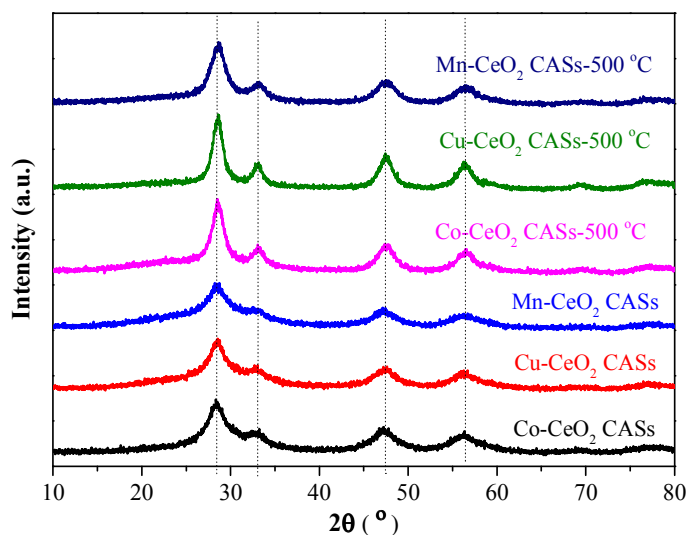

**Figure S7.** XRD patterns of as-synthesized and calcined (Cu, Co, Mn)-CeO<sub>2</sub> CASs at 500 °C.

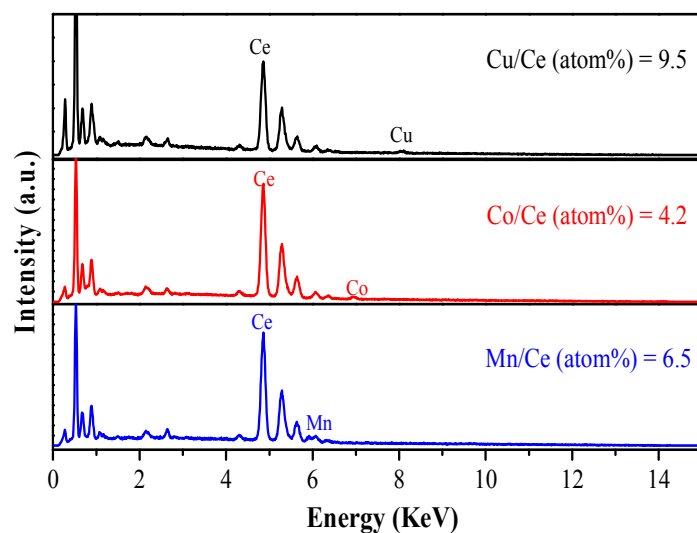

**Figure S8.** EDS spectra of M (Cu, Co, Mn)-CeO<sub>2</sub> CASs calcined at 500 °C. As shown in Figures S7 and S8, the Cu, Co, Mn-CeO<sub>2</sub> CASs samples exhibit the characteristic diffraction peaks of CeO<sub>2</sub>, indicating the successful incorporation of transition metal elements in the CeO<sub>2</sub> CASs.

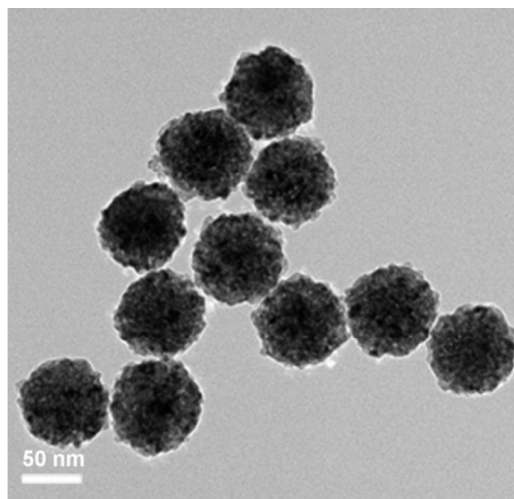

**Figure S9.** TEM image of Pd-CeO<sub>2</sub> CASs after cycling testing 3 times in CO oxidation.

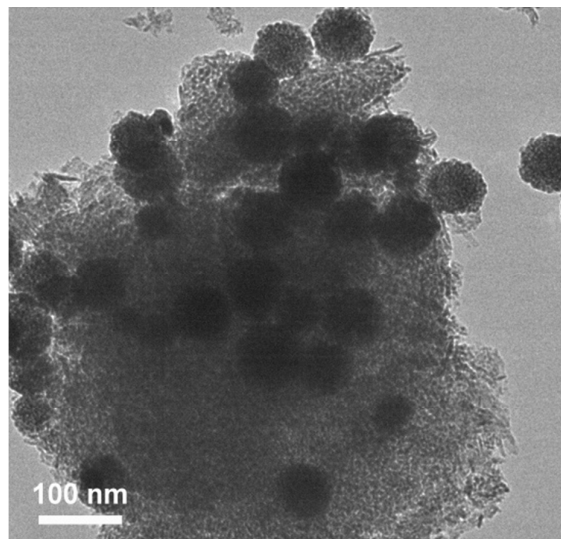

**Figure S10.** TEM image of Pd-CeO<sub>2</sub> CASs/Al<sub>2</sub>O<sub>3</sub>.

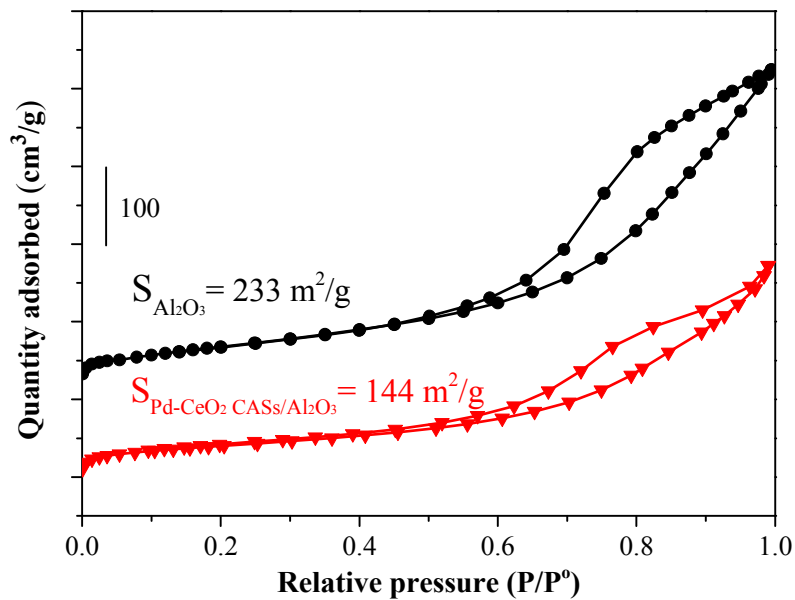

**Figure S11.** N<sub>2</sub> adsorption/desorption isotherms of Al<sub>2</sub>O<sub>3</sub> and Pd-CeO<sub>2</sub> CASs/Al<sub>2</sub>O<sub>3</sub>. The BET surface areas of Al<sub>2</sub>O<sub>3</sub> and Pd-CeO<sub>2</sub> CASs/Al<sub>2</sub>O<sub>3</sub> are 233 m<sup>2</sup>/g and 144 m<sup>2</sup>/g respectively.

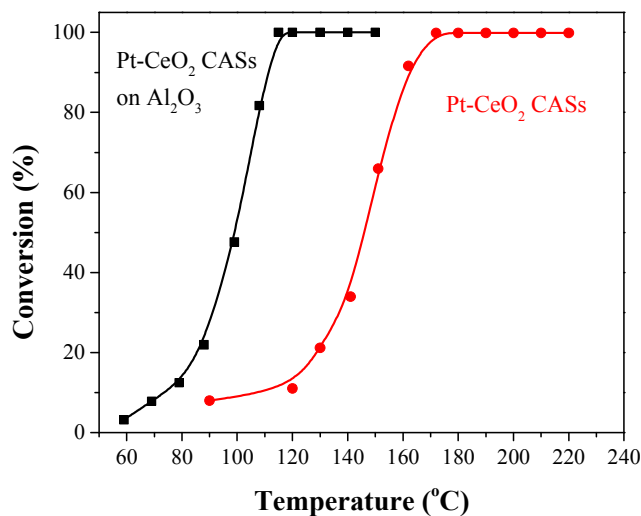

**Figure S12.** Catalytic activities of Pt-CeO<sub>2</sub> CASs and supported Pt-CeO<sub>2</sub> CASs/Al<sub>2</sub>O<sub>3</sub> for CO oxidation.

**Table S1.** The composition of the sample after 1.5 h of reaction \*

| Wt.(%) | C    | H   | O    | N   | Ce | Pd  |
|--------|------|-----|------|-----|----|-----|
|        | 27.4 | 3.8 | 35.6 | 1.1 | 31 | 1.1 |

\* The C, H, N contents were measured by element analysis; Pd, Ce contents were measured by ICP. The O content was balanced by the weight ratio.

## Reference

(1) Bruix, A.; Lykhach, Y.; Matolínová, I.; Neitzel, A.; Skála, T.; Tsud, N.; Vorokhta, M.; Stetsovych, V.; Ševčíková, K.; Mysliveček, J.; Fiala, R.; Václavů, M.; Prince, K. C.; Bruyère, S.; Potin, V.; Illas, F.; Matolín, V.; Libuda, J.; Neyman, K. M. Maximum Noble-Metal Efficiency in Catalytic Materials: Atomically Dispersed Surface Platinum. *Angew. Chem. Int. Ed.*, **2014**, *53*, 10525-10530.
